1 **Individual Behavioral and Physiological Responses During Different**  
2 **Experimental Situations – Consistency over Time and Effects of**  
3 **Context**

4 Alexandra Safryghin, Denise V. Hebesberger & Claudia A.F. Wascher\*

5 Behavioural Ecology Research Group, School of Life Sciences, Anglia Ruskin University,  
6 United Kingdom

7

8 \*Corresponding author at: Claudia A.F. Wascher

9 Email address: [claudia.wascher@anglia.ac.uk](mailto:claudia.wascher@anglia.ac.uk)

10

11

12

13 **Abstract**

14 In a number of species, consistent behavioral differences between individuals have been  
15 described in standardized tests, *e.g.* novel object exploration, open field test. Different  
16 behavioral expressions are reflective of different coping strategies of individuals in stressful  
17 situations. A causal link between behavioral responses and the activation of the physiological  
18 stress response is assumed but not thoroughly studied. Also, most standard paradigms  
19 investigating individual behavioral differences, are framed in a fearful context, therefore the  
20 present study aimed to add a test in a more positive context, the feeding context. We assessed  
21 individual differences in physiological (heart rate, HR) and behavioral responses (presence or  
22 absence of pawing, startle response, defecation, snorting) of twenty domestic horses (*Equus*  
23 *caballus*) in two behavioral experiments, a novel object presentation and a pre-feeding  
24 excitement test. Experiments were conducted twice, in summer and autumn. Both  
25 experiments caused higher mean HR in the first ten seconds after stimulus presentation  
26 compared to a control condition, but mean HR did not differ between the experimental  
27 conditions. Interestingly, in the novel object experiment, horses displaying stress-related  
28 behaviors during the experiments also showed a significantly higher HR increase compared  
29 to horses which did not display any stress-related behaviors, reflecting a correlation between  
30 behavioral and physiological responses to the novel object. On the contrary, in the pre-  
31 feeding experiments, horses that showed fewer behavioral responses had a greater HR  
32 increase, indicating the physiological response being due to emotional arousal and not  
33 behavioral activity. Moreover, HR response to experimental situations varied significantly  
34 between individuals, and although we found HR to be significantly repeatable across  
35 experiments, repeatability indices were low. In conclusion, our findings show that horses'  
36 behavioral and physiological responses differed between test situations and that high

37 emotional reactivity, shown via mean HR and HR increase, is not always displayed

38 behaviorally.

39

40 Key words: individual variation, heart rate, novel object, pre-feeding excitement, domestic

41 horses, *Equus caballus*

42

43

## 44 **Introduction**

45           The perception of a potential threat to homeostasis, caused by extrinsic or intrinsic  
46 stimuli (stressors) results in the activation of the physiological stress response in animals  
47 (Chrousus and Gold 1992; Moberg 1985). Regardless of the intensity of the stressor,  
48 individuals respond both behaviorally and physiologically, and these responses aim to  
49 counteract the effects of the stimuli and to re-establish homeostasis (Chrousus and Gold  
50 1992). Physiological activation in response to a stressor causes a fast release of  
51 norepinephrine in the brain, triggering the activation of the sympatho-adreno-medullary  
52 (SAM) axis, and the hypothalamic-pituitary-adrenal (HPA) axis (Goldstein 2010). As a  
53 consequence, heart rate (HR) and glucocorticoid levels increase (Elia et al. 2010; McGreevy  
54 et al. 2005).

55

56           The way an individual perceives a stressor can significantly influence its  
57 responsiveness (Moberg 1985). Indeed, both endogenous and exogenous factors have been  
58 shown to modulate an animal's sensitivity to a perceived threat, which results in individual  
59 differences in responsiveness within the same species (Gosling 2001). For example, the  
60 presence of constant environmental stressors can lead to a desensitization of the threat-  
61 perception, or learned helplessness, which can cause a reduction of individual responses to a  
62 stressor (Ellis et al. 2014). Furthermore, early differences in environmental stimuli, such as  
63 differences in maternal investment, may cause individuals to follow diverse trajectories,  
64 shaping their behavioral repertoire and physiological responsiveness in different manners  
65 (Claessens et al. 2011; Stamps 2003). For example, Meany (2001) showed how rat pups  
66 raised by low-licking mothers are more fearful and more sensitive to stress in adulthood  
67 compared to pups reared by high-licking mothers. Moreover, animals can be bred to either  
68 show high or low responsiveness to stressors, indicating that individual differences in stress-

69 responsiveness are heritable (Carere et al. 2003; Flaherty and Rowan 1989). Studies on great  
70 tits (*Parus major*) have shown individual physiological stress responses to be related to  
71 differences in exploration strategies (Carere and van Oers 2004) and heritable throughout  
72 four generations (Drent et al. 2003). If individual differences in physiological and/or  
73 behavioral responses are found to be relatively stable across time and contexts, they are  
74 regarded as temperamental traits (Cockrem 2007; Goldsmith et al. 1987; Lansade et al. 2008;  
75 Le Scolan et al. 1997).

76

77         Temperamental traits have been found in both vertebrate and invertebrate taxa (Carere  
78 et al. 2003; Kralj-Fišer et al. 2010; Momozawa et al. 2003; Riechert and Hedrick 1993;  
79 Verbeek et al. 1994; While et al. 2009; Øverli et al. 2006). Studies have shown that  
80 individual differences along the shy-bold axis are linked with aggressiveness (Kralj-Fišer et  
81 al. 2010), exploratory behavior (Sibbald et al. 2009), neophobia (Momozawa et al. 2003), and  
82 physiological responsiveness, such as hormonal (Carere et al. 2003), and HR modulation  
83 (Kralj-Fišer et al. 2010). Heart rate presents a valid indicator of emotional arousal, defined as  
84 an internal state, which is triggered by specific extrinsic or intrinsic stimuli (Anderson and  
85 Adolphs 2014). Arousal can range between the subject being calm – low arousal, and excited  
86 – high arousal, as well as the experience being of positive or negative valence (Russell 1980).  
87 Briefer et al. (2015) have studied the effect of emotional arousal and valence on the  
88 physiological and behavioral response in goats, showing both, positive (feeding) as well as  
89 negative (frustration, isolation) emotional context to cause a significant physiological  
90 response compared to a control situation.

91

92         An evaluation of individual differences in emotional arousal in response to situations  
93 of positive emotional valence or the relationship of activation of the physiological stress

94 response in situations of different emotional valence is still lacking. In the present study, we  
95 aim at investigating individual differences in emotional arousal in response to two  
96 experimental paradigms, a novel object exposure and a test of pre-feeding excitement. So far,  
97 most studies investigating temperamental traits in non-human animals have tested those in  
98 fearful contexts, *e.g.* novel object exploration or open field tasks (Dall and Griffith 2014;  
99 Smith and Blumstein 2008). Thereby we aimed to investigate physiological and behavioral  
100 responses in a fearful (novel object) and anticipatory (pre-feeding excitement) context.

101

102 In horses (*Equus caballus*), diverse factors influencing individual differences in  
103 behavior and physiology have been identified in terms of experience, such as habituation  
104 (Leiner and Fendt 2011), diet (Bulmer et al. 2015), handling (Visser et al. 2002), and  
105 maternal behavior (Haupt and Hintz 1983). Similarly, breed has also been found to strongly  
106 influence individual reactivity, suggesting a relationship between individual responsiveness  
107 and the heritability of traits (Hausberger et al. 2004; Lloyd et al. 2008). Further studies on  
108 equine temperament have focused on the assessment of horse responsiveness to different  
109 stimuli such as diverse environmental conditions (McCall et al. 2006; Schmidt et al. 2010a;  
110 Schmidt et al. 2010b), novel situations (Ellis et al. 2014; Fureix et al. 2009; Leiner and Fendt  
111 2011; Visser et al. 2001; Visser et al. 2002) human interactions in terms of both handling  
112 (Ellis et al. 2014; Fureix et al. 2009; König von Brostel et al. 2011) and riding (Visser et al.  
113 2008) and have shown how an individual's response to threat – or 'fearfulness' – is stable  
114 across time (Lansade et al. 2008; Visser et al. 2001; Visser et al. 2003). However, contrasting  
115 results have been found according to the relationship between HR and behavioral parameters  
116 (Christensen et al. 2005; Lansade et al. 2008; Momozawa et al. 2003). For instance, only  
117 Momozawa et al. (2003) found behavioral correlations with HR in their fear-inducing

118 experiments; results which were not supported in subsequent research (Christensen et al.  
119 2005; Lansade et al. 2008).

120

121           In the present study, we aim at gaining further understanding of the relationship  
122 between individual differences in behavioral and physiological reactivity in horses. Heart rate  
123 represents a standardized, objective and non-invasive measure to infer an individual's  
124 emotional arousal level, readily available to inexperienced behavioral observers (Lansade et  
125 al. 2008; Visser et al. 2003). We question whether physiological responses during a novel  
126 object presentation and pre-feeding test are caused by behavioral changes or purely emotional  
127 arousal, in the absence of behavioral activity. Furthermore, we ask whether behavioral and  
128 physiological responses are stable across time and contexts. We expect that horses show a  
129 greater physiological reaction to a fear-inducing situation such as being exposed to a novel  
130 object, compared to the anticipatory pre-feeding exposure.

131 **Methods**

132 *Animals and housing*

133           The study was conducted at the equine yard of the College of West Anglia (United  
134 Kingdom) between July and November 2017. The research was conducted on 20 horses  
135 which were individually stabled in loose boxes. Five of the 20 horses were tested only in one  
136 of the two experimental conditions, two solely for pre-feeding excitement and three only for  
137 novel object test, due to their lack of availability during testing periods (Table 1). The sample  
138 included 14 geldings (Age: mean  $11.8 \pm 3.8$  years (yrs), range 6 - 18 yrs) and 6 mares (Age:  
139 mean  $11.8 \pm 2.6$  yrs, range 10-17 yrs) of diverse breeds, use, and training experiences (Table  
140 1). The horses were fed twice a day: once in the morning (0800-0830) and once in the  
141 afternoon (1500-1600). Water was available *ad libitum*, and feces were removed from the  
142 stables after the horses were fed. In the late afternoon (1600-1700), some of the horses were  
143 turned out in the paddock for the night.

144

145 *Experimental design*

146           We conducted two experimental tests – the pre-feeding excitement and the novel  
147 object test, presented in random order, with one trial per horse and repeated in summer  
148 (July/August) and in autumn (October/November). Behavior was recorded by video camera  
149 (Canon Legira HF R56), and HR was recorded using a Polar V800 system belt, placed around  
150 the chest of the horses. The belt consists of an electrode belt with a built-in transmitter,  
151 connected via Bluetooth to a wristwatch (receiver). To optimize the contact between the belt  
152 and the skin, both the coat of the horse in the interested area and the belt were wetted. The  
153 receiver was placed at the stable entrance or inside the stable. Prior to each test, an  
154 adjustment period of 5 minutes was allowed to let the horse habituate to the belt.

155           The pre-feeding excitement test was conducted during morning feeds (0800-0830)



156 and started with the horses being shown a bucket containing their individual mix of hard feed  
157 on the floor outside the stable, while the other horses were fed. The horses' physiological and  
158 behavioral responses were recorded for five minutes. Thereafter, the horses were fed by  
159 placing the feeding bucket inside the box and their behavioral and physiological responses  
160 were measured for the following ten minutes.

161 In the novel object test, the horses were exposed to two of three different objects in  
162 their stable. The first object was formed of a main cylindrical hard body (approximately 30  
163 cm in length) filled with gravel which was fixed to a soft foam rubber ball (about 15 cm in  
164 diameter) and covered in fabric. The second object was formed of two cylindrical plastic  
165 tubes fixed together to form an 'x'. Similar to the first object, the cylinders were  
166 approximately 30cm in length, filled with gravel and covered with fabric. In addition, twelve  
167 tennis balls of different colors and materials were pierced and attached to 4 strings (3 balls  
168 per string) of approximately 50 cm in length. These were then tied to the main body of the  
169 object and left hanging. The third object was an inflatable guitar of approximately one meter  
170 in length. All objects were attached to a string, around four-meters-long, to allow their  
171 retrieval from the stable.

172 The object assigned to each individual was randomized for each season as well as the  
173 order of the horses tested. To avoid the horses seeing the object before testing, the objects  
174 were covered from sight when carried around the yard. The novel object tests took place  
175 between the hours of 0900 and 1300 and between 1500 and 1800 when the yard was quiet,  
176 and the horses were fed. The testing procedure was based on the one used by Dai et al. (2015)  
177 and Górecka-Bruzda et al. (2011) and adapted for the present experiment. A novel object was  
178 placed over the box entrance, with the cord hanging over the stable door to keep the object at  
179 the height of approximately one meter. The object was kept in this position for the following

180 five minutes and was then dropped to the floor (the objects filled with gravel created a  
181 muffled noise). The horse reaction was recorded for the following five minutes. Thereafter,  
182 the object was removed from the stable, whilst behavioral monitoring and HR measurement  
183 continued for another 15 minutes.

184 *Ethical statement*

185 All applied methods were non-invasive, and the experimental procedure was  
186 approved by Anglia Ruskin University's Departmental Research Ethics Panel.

187 *Data processing*

188 Raw HR data were purged with a moving average filter to remove biologically  
189 implausible outlier values. The following HR variables were calculated: (1) mean HR in  
190 beats per minute (bpm) for the ten seconds preceding and following the food presentation, as  
191 well as preceding (control) and following the presentation, drop and removal of the object;  
192 (2) HR increase in bpm following the food presentation and novel object presentation, drop,  
193 and removal, calculated as difference between maximum value and three seconds average HR  
194 before the presentation of the stimuli.

195 Behavioral responses of the horses were analyzed from videos using SOLOMON  
196 Coder v. beta 17.03.22 (András Péter, [www.solomoncoder.com](http://www.solomoncoder.com)). The behavior of the  
197 individuals was analyzed for the five minutes prior to the presentation of the hard feed for the  
198 pre-feeding excitement. For the novel object task, the five minutes following the presentation  
199 and drop of the object and the two minutes following its removal were analyzed. Behavior  
200 was recorded as continuous variables, *e.g.*, feeding as duration of behavior in s per  
201 observation period, or frequency of behavior per observation period, *e.g.*, snorting. The  
202 classification of the individual in high and low behavioral respondents was based on the

203 frequency and duration of vocalizations, pawing behavior, startle response and defecation  
204 that the individuals performed during the experimental settings (Table 2).

205

### 206 *Statistical Analysis*

207 All data were analyzed using R version 3.4.3 (R Core Team, 2017; RStudio Team  
208 2016). Generalized linear mixed models (GLMM) were conducted with the additional  
209 packages ‘glmmADMB’ (Skaug et al. 2016). For the comparison of HR, two generalized  
210 linear models were calculated. Experiment (pre-feeding excitement versus novel object), test  
211 period and behavioral category (high versus low respondents) were considered as fixed  
212 factors in both models, together with the interaction between behavioral category and  
213 experimental condition. For the purpose of the analysis, the different conditions of each  
214 experiment were individually included in the dataset, resulting in horses having multiple  
215 values per each experimental condition. The response variable was assigned to the ten second  
216 average HR (GLMM1) and the HR increase (GLMM2). Tukey test for multiple comparisons  
217 was chosen to gain further understanding of the effect of the categories of the fixed factors in  
218 the models. Specifically, the ‘multcomp’ (Hothorn et al. 2008) package was used to conduct  
219 the post hoc analysis. Moreover, we used a likelihood ratio test to compare models fit  
220 according to presence or absence of the individual random effect. Also, individual  
221 repeatability of the physiological and behavioral measurements was assessed using the ‘rptR’  
222 package (Stoffel et al. 2017). In particular, we assessed the repeatability of the ten second  
223 average HR and HR increase with 1000 permutations for the physiological reactivity data  
224 collected for the control, novel object and pre-feeding conditions. The significance level was  
225 set at  $\alpha = 0.05$ .

226 **Results**

227 *Seasonal variation and behavioral categorization*

228 Horses had a significantly higher mean HR during summer compared to autumn  
229 (GLMM1:  $z = 2.713$ ,  $p = 0.007$ ), but HR increase was not significantly different between the  
230 seasons (GLMM2:  $z = -0.94$ ,  $p = 0.348$ ). Out of the 20 horses tested, only four individuals  
231 were consistently categorized as high behavioral responders and one individual as low  
232 behavioral responder, in both experiments (novel object, pre-feeding excitement) and seasons  
233 (summer and autumn; see Table 1 for details).

234

235 *Physiological and behavioral responses to experimental situations*

236 Average HR of the horses was significantly higher during the novel object experiment  
237 compared to the control period (Tukey:  $z = 5.205$ ,  $p < 0.001$ ; Figure 1A, Figure 2) and tended  
238 to be higher during the pre-feeding excitement compared to the control period (Tukey:  $z =$   
239  $2.197$ ,  $p = 0.0662$ ; Figure 1A, Figure 2). Heart rate between novel object and pre-feeding  
240 excitement was not significantly different (Tukey: mean:  $z = -1.887$ ,  $p = 0.133$ ; Figure 1A,  
241 Figure 2), despite horses showing a significantly lower HR increase in the pre-feeding  
242 condition (GLMM2:  $z = -3.59$ ,  $p < 0.001$ ; Figure 1B). We found a significant interaction  
243 between behavior and experiment affecting HR. Mean HR during the novel object  
244 experiment was significantly higher in the group of horses showing a high behavioral  
245 response compared to horses showing a low behavioral response (GLMM1:  $z = -3.139$ ,  $p =$   
246  $0.002$ ; Figure 1A). This pattern reversed regarding HR increase in the pre-feeding  
247 experiment, with the horses showing a low behavioral response having a higher HR increased  
248 compared to individuals with a high behavioral response (GLMM2:  $z = 3.56$ ,  $p < 0.001$ ;  
249 Figure 1B). Finally, the models including individual identity as random factor had a  
250 significantly better fit compared to the models without the random effect (ANOVA: mean

251 HR: Deviance = 14.632, df = 1, p = 0.001; HR increase: Deviance = 7.984, df = 1, p = 0.005),  
252 indicating that the random effect also significantly variance in the data.

253

254 *Repeatability*

255 Individual horses' HR was significantly repeatable across experiments. However, the  
256 repeatability indices were low for both parameters tested, with the highest repeatability score  
257 recorded for the HR increase ( $R = 0.265$ , CI 95% [0.07, 0.442],  $p < 0.001$ ); followed by mean  
258 HR ( $R = 0.201$ , CI 95% [0.06, 0.343],  $p < 0.001$ ).

259

260

261 **Discussion**

262 In the present study, we investigated individual behavioral and physiological  
263 responses of horses during two experimental procedures, a novel object experiment and a  
264 pre-feeding excitement test. Surprisingly, we found rather little behavioral consistency across  
265 tests and only a limited number of individuals responded similarly across contexts and  
266 seasons, which would have been expected when behavioral responses in experimental tests  
267 are indicative of temperamental traits. In contrast to behavior, heart rate (HR) was  
268 significantly repeatable across experiments, although it has to be pointed out that the  
269 repeatability indices were low. This indicates that physiological responses to experiments  
270 were consistent over time and contexts, as expected for temperamental traits. Repeatable  
271 individual variation in behavior, *i.e.* personality has been very much in focus of scientific  
272 research in recent years and was described in a vast variety of species, including horses  
273 (Grajfoner et al. 2010; Momozawa et al. 2005), however most of these studies are focusing  
274 on behavior rather than underlying physiological processes. For example, Grajfoner et al.  
275 (2010) compared individual horse behavioral ratings between high and low performers,  
276 showing how the combination of multiple traits, such as a horse being “nice”, “patient”,  
277 “easy to handle”, shape the perceived personality of horses. On the contrary, only a few  
278 studies investigated individual differences in physiological responses and their relationships  
279 with behavioral reactivity in non-human animals (Briefer et al. 2015; Ellis et al. 2014).

280

281 We described context dependent links between behavioral and physiological  
282 response. The two conducted experiments differed regarding their context, with the novel  
283 object experiment being considered as a fear-inducing situation (Dalmau et al. 2009; Lansade  
284 et al. 2008; Leiner and Fendt 2011), whereas the pre-feeding excitement test presents an  
285 anticipatory context (Mahnhardt et al. 2014). In the novel object experiment, a classic

286 temperament test in non-human animals' personality research (Carter et al. 2013), individuals  
287 who were behaviorally active also showed a higher average HR. This is especially relevant as  
288 the presentation of a novel object can be seen as a fear-inducing situation (Leiner and Fendt  
289 2011). The results of the present study confirm that increased physical activity resulting from  
290 the performance of stress-related behaviors (*e.g.*, startle response) correlates with higher  
291 mean HR compared to individuals not responding behaviourally in the experiment. It is  
292 difficult to conclude whether the physiological activation is caused by increased emotional  
293 arousal, *i.e.* the perception of fear or the increased physical activity, *e.g.* locomotion (von  
294 Borell et al. 2007; Visser et al. 2002).

295

296         A different pattern became apparent during the pre-feeding excitement task. Here,  
297 individuals lacking a behavioral response during the experiment showed a higher HR  
298 increase. This indicates that emotional arousal, but not physical activity, accounted for the  
299 increase in HR. Horses that were classified as highly behaviorally responsive during the pre-  
300 feeding experiments had an undetectable increase in HR, reflecting that physical activity may  
301 have increased their HRs before the presentation of the feed. Once the feed was presented  
302 their arousal level may not have changed in amplitude, as no significant HR increase was  
303 recorded, but possibly in valence, from negative to positive. Effects of emotional arousal on  
304 physiological responses have already been identified in other non-human animals. For  
305 example, in the study by Wascher et al. (2008), immobile greylag geese (*Anser anser*)  
306 watching aggressive interaction between conspecifics showed a significantly higher increase  
307 in HR compared to geese watching non-social interactions. Moreover, an increase in  
308 physiological reactivity resulting solely from emotional arousal was also identified in guide  
309 dogs (Fallani et al. 2007).

310

311 Our findings show that HR in the control situations did not necessarily predict HR  
312 during the experiments and horses differed in the strength of their responses, with some even  
313 decreasing HR. Such variation, together with the repeatability of the physiological reactivity,  
314 reflected how behavioral responses of horses do not necessarily predict physiological  
315 reactions during a novel object and pre-feeding excitement test. This is in line with previous  
316 studies on horses describing that individual classified as calmer had higher HR compared to  
317 more excited individuals despite showing less behavioral signs of stress when tested for pre-  
318 feeding reactivity (Ellis et al. 2014), as well as with other studies on cattle (*e.g.*, Christensen  
319 et al. 2005; Jezierski et al. 1999; Lansade et al. 2008; Welp et al. 2004).

320

321 Classical models regarding individual differences in behavior and physiology, assume  
322 them to be associated with each other to form different coping styles (Koolhaas et al. 1999).  
323 However, evidence for independent modulation of the hypothalamic-pituitary-adrenal axis  
324 (Boulton et al. 2015; Dosmann et al. 2015; Ferrari et al. 2013), the sympatho-adreno-  
325 medullary axis (Qu et al. 2018), and behavioral traits have been recently accumulating. Our  
326 study provides further evidence that HR and behavior might be regulated independently.

327

328 To conclude, our study illustrates the importance of accounting for context when  
329 studying individual differences in non-human animals, and we suggest that the inclusion of  
330 tests in non-fear related contexts is desirable. Further, we point at the importance of studying  
331 interconnectedness and independencies between physiological and behavioral reactions.

332

### 333 **Acknowledgements**

334 We would like to thank Elizabeth Ragg and Nikki Bentley from the College of West Anglia  
335 for granting us access to their facilities and horses to conduct our experiments. Furthermore,



336 we would like to thank all members of staff for helping us to facilitate our research on site.

337 Finally, we would also like to thank Irene Susini for discussion and comments on the

338 manuscript.

### 339 **Author Contribution statement**

340 A.S., D.V.H. & C.A.F.W. designed the experiments

341 A.S. & D.V.H. conducted the experiments

342 A.S. & C.A.F.W. analyzed the data

343 A.S., D.V.H. & C.A.F.W. wrote the paper

344

### 345 **Conflict of interest**

346 The authors declare that they have no competing interests.

347

### 348 **References**

349 Anderson, D. J. and Adolphs, R., 2014. A framework for studying emotions across species.

350 *Cell*, 157(1), pp. 187-200. doi: 10.1016/j.cell.2014.03.003

351 Boulton, K., Couto, E., Grimmer, A. J., Earley, R. L., Canario, A. V. M., Wilson, A. J., et al.,

352 2015. How integrated are behavioral and endocrine stress response traits? A repeated

353 measures approach to testing the stress-coping style model. *Ecology and Evolution*,

354 5(3), pp. 618–633. doi: 10.1002/ece3.1395

- 355 Briefer, E. F., Tettamanti, F. and McElligott, A. G., 2015. Emotions in goats: Mapping  
356 physiological, behavioural and vocal profiles. *Animal Behaviour*, 99, pp. 131-143.  
357 doi: 10.1016/j.anbehav.2014.11.002
- 358 Bulmer, L., McBride, S., Williams, K. and Murray, J., 2015. The effects of a high-starch or  
359 high-fibre diet on equine reactivity and handling behaviour. *Applied Animal*  
360 *Behaviour Science*, 165, pp. 95-102. doi: 10.1016/j.applanim.2015.01.008
- 361 Carere, C., Groothuis, T. G., Möstl, E., Daan, S. and Koolhaas, J. M., 2003. Fecal  
362 corticosteroids in a territorial bird selected for different personalities: daily rhythm  
363 and the response to social stress. *Hormones and Behavior*, 43(5), pp. 540-548. doi:  
364 10.1016/S0018-506X(03)00065-5
- 365 Carere, C. and van Oers, K., 2004. Shy and bold great tits (*Parus major*): body temperature  
366 and breath rate in response to handling stress. *Psychology & Behavior*, 82, pp. 905-  
367 912. doi: 10.1016/j.physbeh.2004.07.009
- 368 Carter, A. J., Feeney, W. E., Marshall, H. H., Cowlshaw, G., and Heinsohn, R., 2013.  
369 Animal personality: What are behavioural ecologists measuring? *Biological Reviews*,  
370 88(2), pp.465–475. doi: 10.1111/brv.12007
- 371 Christensen, J. W., Keeling, L. J. and Nielsen, B. L., 2005. Responses of horses to novel  
372 visual, olfactory and auditory stimuli. *Applied Animal Behaviour Science*, 93(1-2), pp.  
373 53-65. doi: 10.1016/j.applanim.2005.06.017
- 374 Chrousos, G. P. and Gold, P. W., 1992. The concepts of stress and stress system disorders.  
375 Overview of physical and behavioral homeostasis. *Journal of the American Medical*  
376 *Association*, 267(9), pp. 1244-52. doi: 10.1001/jama.1992.03480090092034

- 377 Claessens, S. E., Daskalakis, N.P., van der Veen, R., Oitzl, M. S., de Kloet, E. R. and  
378 Champagne, D. L., 2011. Development of individual differences in stress  
379 responsiveness: an overview of factors mediating the outcome of early life  
380 experiences. *Psychopharmacology*, 214(1), pp. 141-154. doi: 10.1007/s00213-010-  
381 2118-y
- 382 Cockrem, J. F., 2007. Stress, corticosterone responses and avian personalities. *Journal of*  
383 *Ornithology*, 148(2), pp. 169-178. doi: 10.1007/s10336-007-0175-8
- 384 Dai, F., Cogi, N. H., Heinzl, E. U. L., Dalla Costa, E., Canali, E. and Minero, M., 2015.  
385 Validation of a fear test in sport horses using infrared thermography. *Journal of*  
386 *Veterinary Behavior-clinical Applications and Research*, 10(2), pp. 128-136. doi:  
387 10.1016/j.jveb.2014.12.001
- 388 Dall, S. R. X. and Griffith, S. C., 2014. An empiricist guide to animal personality variation in  
389 ecology and evolution. *Frontiers in Ecology and Evolution*, 2(3). doi:  
390 10.3389/fevo.2014.00003
- 391 Dalmau, A., Fabrega, E., and Velarde, A., 2009. Fear assessment in pigs exposed to a novel  
392 object test. *Applied Animal Behaviour Science*, 117(3–4), pp.173–180. doi:  
393 10.1016/j.applanim.2008.12.014
- 394 Dosmann, A. J., Brooks, K. C., and Mateo, J. M., 2015. Within-individual correlations reveal  
395 link between a behavioral syndrome, condition and cortisol in free-ranging Belding's  
396 ground squirrels. *Ethology*, 121(2), pp.125–134. doi: 10.1111/eth.12320
- 397 Drent, P. J., van Oers, K. and van Noordwijk, A. J., 2003. Realized heritability of  
398 personalities in the great tit (*Parus major*). *Proceedings of the Royal Society of*

- 399           *London. Series B: Biological Sciences*, 270(1510), pp. 45-51. doi:  
400           10.1098/rspb.2002.2168
- 401   Elia, J. B., Erb, H. N. and Houpt, K. A., 2010. Motivation for hay: Effects of a pelleted diet  
402           on behavior and physiology of horses. *Physiology & Behavior*, 101(5), pp. 623-627.  
403           doi: 10.1016/j.physbeh.2010.09.010
- 404   Ellis, A. D., Stephenson, M., Preece, M. and Harris, P., 2014. A novel approach to  
405           systematically compare behavioural patterns between and within groups of horses.  
406           *Applied Animal Behaviour Science*, 161, pp. 60-74. doi:  
407           10.1016/j.applanim.2014.09.017
- 408   Fallani, G., Previde, E. P. and Valsecchi, P., 2007. Behavioral and physiological responses of  
409           guide dogs to a situation of emotional distress. *Physiology & Behavior*, 90(4), pp.  
410           648-655. doi: 10.1016/j.physbeh.2006.12.001
- 411   Ferrari, C., Pasquaretta, C., Carere, C., Cavallone, E., von Hardenberg, A., and Réale, D.,  
412           2013. Testing for the presence of coping styles in a wild mammal. *Animal Behaviour*,  
413           85(6), pp.1385–1396. doi: 10.1016/j.anbehav.2013.03.030
- 414   Flaherty, C. and Rowan, G., 1989. Rats (*Rattus norvegicus*) selectively bred to differ in  
415           avoidance behavior also differ in response to novelty stress, in glycemic conditioning,  
416           and in reward contrast. *Behavioral and Neural Biology*, 51(2), pp. 145-169. doi:  
417           10.1016/S0163-1047(89)90782-6
- 418   Fureix, C., Pagès, M., Bon, R., Lassalle, J. M., Kuntz, P. and Gonzalez, G., 2009. A  
419           preliminary study of the effects of handling type on horses' emotional reactivity and  
420           the human-horse relationship. *Behavioural Processes*, 82(2), pp. 202-210. doi:  
421           10.1016/j.beproc.2009.06.012

- 422 Goldsmith, H., Buss, A., Plomin, R., Rothbart, M., Thomas, A., Chess, S., et al., 1987.  
423 Roundtable: What is temperament? Four approaches. *Child Development*, 58(2), p.  
424 505-529. doi: 10.2307/1130527
- 425 Goldstein, D. S., 2010. Adrenal responses to stress. *Cellular and Molecular Neurobiology*,  
426 30(8), pp. 1433-1440. doi: 10.1007/s10571-010-9606-9
- 427 Gosling, S. D., 2001. From mice to men: what can we learn about personality from animal  
428 research? *Psychological Bulletin*, 127(1), pp. 45–86. doi: 10.1037/0033-  
429 2909.127.1.45
- 430 Grajfoner, D. D., Austin, E. J. and Wemelsfelder, F., 2010. Horse personality profiles and  
431 performance. *Journal of Veterinary Behavior-clinical Applications and Research*,  
432 5(1), pp. 26-27. doi: 10.1016/j.jveb.2009.10.035
- 433 Górecka-Bruzda, A., Jastrzębska, E., Sosnowska, Z., Jaworski, Z., Jezierski, T. and  
434 Chruszczewski, M. H., 2011. Reactivity to humans and fearfulness tests: Field  
435 validation in Polish cold blood horses. *Applied Animal Behaviour Science*, 133(3), pp.  
436 207-215. doi: 10.1016/j.applanim.2011.05.011
- 437 Hausberger, M., Bruderer, C., Le Scolan, N. and Pierre, J. S., 2004. Interplay between  
438 environmental and genetic factors in temperament/personality traits in horses (*Equus*  
439 *caballus*). *Journal of Comparative Psychology*, 118(4), pp. 434-446. doi:  
440 10.1037/0735-7036.118.4.434
- 441 Hothorn, T., Bretz, F. and Westfall, P., 2008. Simultaneous inference in general parametric  
442 models. *Biometrical Journal*, 50(3), pp.346-363. doi: 10.1002/bimj.200810425

- 443 Houpt, K. A. and Hintz, H., 1983. Some effects of maternal deprivation on maintenance  
444 behavior, spatial relationships and responses to environmental novelty in foals.  
445 *Applied Animal Ethology*, 76(2), pp. 297-307. doi: 10.1016/0304-3762(83)90002-0
- 446 Jezierski, T., Jaworski, Z. and Górecka- Bruzda, A., 1999. Effects of handling on behaviour  
447 and heart rate in Konik horses: comparison of stable and forest reared youngstock,  
448 *Applied Animal Behaviour Science*, 62(1), pp.1-11. doi: 10.1016/S0168-  
449 1591(98)00209-3
- 450 König von Brostel, U., Euent, S., Graf, P., König, S. and Gauly, M., 2011. Equine behaviour  
451 and heart rate in temperament tests with or without rider or handler. *Physiology &*  
452 *Behavior*, 104(3), pp. 454-463. doi: 10.1016/j.physbeh.2011.05.010
- 453 Koolhaas, J. M., Korte, S. M., De Boer, S. F., Van Der Vegt, B. J., Van Reenen, C. G.,  
454 Hopster, H. et al., 1999. Coping styles in animals: Current status in behavior and  
455 stress- physiology. *Neuroscience and Biobehavioral Reviews*, 23(7), pp.925–935. doi:  
456 10.1016/S0149-7634(99)00026-3
- 457 Kralj-Fišer, S., Weiß, B. M. and Kotrschal, K., 2010. Behavioural and physiological  
458 correlates of personality in greylag geese (*Anser anser*). *Journal of Ethology*, 28(2),  
459 pp. 363-370. doi: 10.1007/s10164-009-0197-1
- 460 Lansade, L., Bouissou, M. and Erhard, H. W., 2008. Fearfulness in horses: A temperament  
461 trait stable across time and situations. *Applied Animal Behaviour Science*, 115(3), pp.  
462 182-200. doi: 10.1016/j.applanim.2008.06.011
- 463 Le Scolan, N., Hausberger, M. and Wolff, A., 1997. Stability over situations in  
464 temperamental traits of horses as revealed by experimental and scoring approaches.  
465 *Behavioural Processes*, 41(3), pp. 257-266. doi: 10.1016/S0376-6357(97)00052-1

- 466 Leiner, L. and Fendt, M., 2011. Behavioural fear and heart rate responses of horses after  
467 exposure to novel objects: Effects of habituation. *Applied Animal Behaviour*  
468 *Science*, 131(3), pp. 104-109. doi: 10.1016/j.applanim.2011.02.004
- 469 Lloyd, A. S., Martin, J. E., Bornett-Gauci, H. L. and Wilkinson, R. G., 2008. Horse  
470 personality: Variation between breeds. *Applied Animal Behaviour Science*, 112(3), pp.  
471 369-383. doi: 10.1016/j.applanim.2007.08.010
- 472 Mahnhardt, S., Brietzke, J., Kanitz, E., Schön, P. C., Tuchscherer, A., Gimsa, U. et al., 2014.  
473 Anticipation and frequency of feeding affect heart reactions in domestic pigs. *Journal*  
474 *of Animal Science*, 92(11), pp.4878–4887. doi: 10.2527/jas.2014-7752
- 475 McCall, C. A., Hall, S., McElhenney, W. H. and Cummins, K. A., 2006. Evaluation and  
476 comparison of four methods of ranking horses based on reactivity. *Applied Animal*  
477 *Behaviour Science*, 96(1-2), pp. 115-127. doi: 10.1016/j.applanim.2005.04.021
- 478 McGreevy, P. D., Righetti, J. and Thomson, P. C., 2005. The reinforcing value of physical  
479 contact and the effect on canine heart rate of grooming in different anatomical areas.  
480 *Anthrozoos*, 18(3), pp. 236-244.
- 481 Meaney, M. J., 2001. Maternal care, gene expression, and the transmission of individual  
482 differences in stress reactivity across generations. *Annual Review of Neuroscience*. 24.  
483 pp. 1161-1192. doi: 10.1146/annurev.neuro.24.1.1161.
- 484 Moberg, G. P., 1985. Biological response to stress: key to assessment of animal well-being?  
485 In: G. P. Moberg, ed. *Animal Stress*. New York: Springer.
- 486 Momozawa, Y., Ono, K., Sato, F., Kikusui, T., Takeuchi, Y., Mori, Y. et al., 2003.  
487 Assessment of equine temperament by a questionnaire survey to caretakers and

- 488 evaluation of its reliability by simultaneous behavior test. *Applied Animal Behaviour*  
489 *Science*, 84(2), pp. 127-138. doi: 10.1016/j.applanim.2003.08.001
- 490 Momozawa, Y., Kusunose, R., Kikusui, T., Takeuchi, Y. and Mori, Y., 2005. Assessment of  
491 equine temperament questionnaire by comparing factor structure between two  
492 separate surveys. *Applied Animal Behaviour Science*, 92(1-2), pp. 77-84. doi:  
493 10.1016/j.applanim.2004.11.006
- 494 Qu, J., Fletcher, Q. E., Réale, D., Li, W., and Zhang, Y., 2018. Independence between coping  
495 style and stress reactivity in plateau pika. *Physiology and Behavior*, 197, pp.1–8. doi:  
496 doi: 10.1016/j.physbeh.2018.09.007
- 497 Riechert, S. E. and Hedrick, A. V., 1993. A test for correlations among fitness-linked  
498 behavioural traits in the spider *Agelenopsis aperta* (*Araneae, agelenidae*). *Animal*  
499 *Behaviour*, 46(4), pp. 669-675. doi: 10.1006/anbe.1993.1243
- 500 Russell, J. A., 1980. A circumplex model of affect. *Journal of Personality and Social*  
501 *Psychology*, 39(6), pp. 1161-1178. doi: 10.1037/h0077714
- 502 Schmidt, A., Biau, S., Möstl, E., Becker-Birck, M., Morillon, B., Aurich, J. et al. 2010a.  
503 Changes in cortisol release and heart rate variability in sport horses during long-  
504 distance road transport. *Domestic Animal Endocrinology*, 38(3), pp. 179-189. doi:  
505 10.1016/j.domaniend.2009.10.002
- 506 Schmidt, A., Möstl, E., Wehnert, C., Aurich, J., Müller, J. and Aurich, C., 2010b. Cortisol  
507 release and heart rate variability in horses during road transport. *Hormones and*  
508 *Behavior*, 57(2), pp. 209-215. doi: 10.1016/j.yhbeh.2009.11.003



- 509 Sibbald, A. M., Erhard, H. W., McLeod, J. E. and Hooper, R. J., 2009. Individual personality  
510 and the spatial distribution of groups of grazing animals: an example with sheep.  
511 *Behavioural Processes*, 82(3), pp. 319-326. doi: 10.1016/j.beproc.2009.07.011
- 512 Skaug H., Fournier D., Bolker B., Magnusson, A. and Nielsen, A., 2016. \_Generalized Linear  
513 Mixed Models using 'AD Model Builder'\_. R package version 0.8.3.3.
- 514 Smith, B. R. and Blumstein, D. T., 2008. Fitness consequences of personality: a meta-  
515 analysis. *Behavioural Ecology*, 19(2), pp. 448-455. doi: 10.1093/beheco/arm144
- 516 Stamps, J. A., 2003. Behavioural processes affecting development: Tinbergen's fourth  
517 question comes of age. *Animal Behaviour*, 66(1), pp. 1-13. doi:  
518 10.1006/anbe.2003.2180
- 519 Stoffel, M. A., Nakagawa, S. and Schielzeth, H., 2017. rptR: repeatability estimation and  
520 variance decomposition by generalized linear mixed-effects models. *Methods in*  
521 *Ecology and Evolution*, 8(11), pp. 1639-1644. doi: 10.1111/2041-210X.12797
- 522 R Core Team, 2017. R: A language and environment for statistical computing. R Foundation  
523 for Statistical Computing, Vienna, Austria. URL <http://www.R-project.org/>.
- 524 RStudio Team, 2016. RStudio: Integrated Development for R. RStudio, Inc., Boston, MA  
525 URL <http://www.rstudio.com/>.
- 526 Verbeek, M. E., Drent, P. J. and Wiepkema, P., 1994. Consistent individual differences in  
527 early exploratory behaviour of male great tits. *Animal Behaviour*, 48(5), pp. 1113-  
528 1121. doi: 10.1006/anbe.1994.1344

- 529 Visser, E. K., Ellis, A. D. and van Reenen, C. G., 2008. The effect of two different housing  
530 conditions on the welfare of young horses stabled for the first time. *Applied Animal  
531 Behaviour Science*, 114(3), pp. 521-533. doi: 10.1016/j.applanim.2008.03.003
- 532 Visser, E. K., van Reenen, C. G., Hopster, H., Schilder, M. B. H., Knaap, J., Barneveld, A. et  
533 al., 2001. Quantifying aspects of young horses' temperament: consistency of  
534 behavioural variables. *Applied Animal Behaviour Science*, 74(4), pp. 241-258. doi:  
535 10.1016/S0168-1591(01)00177-0
- 536 Visser, E. K., van Reenen, C. G., Schilder, M. B. H., Barneveld, A. and Blokhuis, H. J., 2003.  
537 Learning performances in young horses using two different learning tests. *Applied  
538 Animal Behaviour Science*, 80(4), pp. 311-326. doi: 10.1016/S0168-1591(02)00235-6
- 539 Visser, E. K., van Reenen, C. G., van der Werf, J., Schilder, M. B. H., Knaap, J., Barneveld,  
540 A. et al., 2002. Heart rate and heart rate variability during a novel object test and a  
541 handling test in young horses. *Physiology & Behavior*, 76(2), pp. 289-296. doi:  
542 10.1016/S0031-9384(02)00698-4
- 543 von Borell, E., Langbein, J., Després, G., Hansen, S., Leterrier, C., Marchant-Forde, J. et al.,  
544 2007. Heart rate variability as a measure of autonomic regulation of cardiac activity  
545 for assessing stress and welfare in farm animals: A review. *Physiology & Behavior*,  
546 92(3), pp. 293-316. doi: 10.1016/j.physbeh.2007.01.007
- 547 Wascher, C. A. F., Scheiber, I. B. R., and Kotrschal, K., 2008. Heart rate modulation in  
548 bystanding geese watching social and non-social events. *Proceedings of the Royal  
549 Society B: Biological Sciences*, 275(1643), pp.1653-1659. doi:  
550 10.1098/rspb.2008.0146

- 551 Welp, T., Rushen, J., & Kramer, D. L., Festa-Bianchet, M. and de Passille, A. M., 2004.  
552 Vigilance as a measure of fear in dairy cattle. *Applied Animal Behaviour Science*.  
553 87(1-2), pp. 1-13. doi: 10.1016/j.applanim.2003.12.013
- 554 While, G. M., Sinn, D. L. and Wapstra, E., 2009. Female aggression predicts mode of  
555 paternity acquisition in a social lizard. *Proceedings of the Royal Society B: Biological*  
556 *Sciences*, 276(1664), pp. 2021-2029. doi: 10.1098/rspb.2008.1926
- 557 Øverli, Ø., Sørensen, C. and Nilsson, G., 2006. Behavioral indicators of stress-coping style in  
558 rainbow trout: Do males and females react differently to novelty? *Physiology &*  
559 *Behavior*, 87(3), pp. 506-512. doi: 10.1016/j.physbeh.2005.11.012

560 **Table 1.** Age in years, sex and breed of the 20 horses tested for this study. Mean heart rate  
 561 and standard deviation during the different experimental situations as well as whether  
 562 the horses were categorized as high (orange) or low (blue) behavioral responders.

| ID | Age | Sex     | Breed              | NO 1          | NO2           | PF1           | PF2           |
|----|-----|---------|--------------------|---------------|---------------|---------------|---------------|
| 1  | 13  | Gelding | Cob                | NA            | NA            | 48.29 ± 9.89  | 57.14 ± 12.43 |
| 2  | 14  | Gelding | Welsh Pony         | 51.47 ± 8.87  | 51.21 ± 5.66  | 67.27 ± 12.41 | 54.42 ± 8.01  |
| 3  | 17  | Mare    | Gypsy Cob          | 54.77 ± 9.71  | 45.16 ± 3.44  | NA            | NA            |
| 4  | 8   | Gelding | Cob                | 44.54 ± 1.56  | 38.37 ± 0.40  | 41.08 ± 5.62  | 33.69 ± 2.48  |
| 5  | 14  | Gelding | Cob                | 46.82 ± 2.69  | 54.67 ± 3.85  | 51.29 ± 9.89  | 55.47 ± 10.65 |
| 6  | 9   | Gelding | KWPN               | 43.87 ± 6.93  | 45.93 ± 12.30 | 39.01 ± 2.80  | 39.95 ± 7.07  |
| 7  | 10  | Mare    | Welsh Crossbred    | 62.40 ± 12.40 | 43.16 ± 1.92  | 48.06 ± 5.75  | 65.76 ± 14.01 |
| 8  | 16  | Gelding | Welsh Crossbred    | 71.47 ± 18.82 | 44.41 ± 2.40  | 68.63 ± 9.19  | 53.98 ± 13.29 |
| 9  | 13  | Gelding | Cob                | NA            | NA            | 55.57 ± 5.06  | 50.73 ± 1.53  |
| 10 | 12  | Gelding | KWPN               | 54.30 ± 5.87  | 40.24 ± 8.05  | NA            | NA            |
| 11 | 16  | Gelding | Shire X Warmblood  | 83.26 ± 20.00 | 80.03 ± 29.02 | 60.78 ± 7.80  | 46.88 ± 6.05  |
| 12 | 11  | Mare    | Appaloosa X Cob    | 42.84 ± 1.54  | 41.92 ± 8.30  | 60.89 ± 3.36  | 48.30 ± 12.39 |
| 13 | 11  | Gelding | Welsh Section A    | 62.73 ± 20.70 | 55.29 ± 25.91 | NA            | NA            |
| 14 | 12  | Mare    | Thoroughbred X Cob | 43.93 ± 3.47  | 47.27 ± 4.77  | 61.14 ± 7.16  | 46.12 ± 3.40  |
| 15 | 18  | Gelding | Thoroughbred       | 44.43 ± 8.47  | 36.94 ± 4.96  | 41.58 ± 1.78  | 33.59 ± 1.90  |
| 16 | 10  | Mare    | Cob                | 44.28 ± 12.98 | 66.93 ± 15.66 | 42.84 ± 4.98  | 44.89 ± 7.01  |
| 17 | 6   | Gelding | KWPN               | 36.67 ± 2.59  | 31.41 ± 1.52  | 42.10 ± 4.30  | 38.41 ± 2.57  |
| 18 | 9   | Gelding | Irish Sports Pony  | 69.63 ± 15.71 | 62.12 ± 8.10  | 64.30 ± 12.74 | 36.77 ± 3.04  |
| 19 | 11  | Mare    | Warmblood          | 40.25 ± 4.11  | 42.52 ± 6.27  | 50.69 ± 17.53 | 38.71 ± 4.06  |
| 20 | 6   | Gelding | Cob                | 44.22 ± 9.89  | 39.63 ± 4.86  | 53.74 ± 8.18  | 37.48 ± 3.31  |

563 **Table 2.** Description of behavioral categories and number of individuals per category, per  
564 season.

| <b>Condition</b> | <b>Value</b> | <b>Description</b>                                                                                                            | <b>n</b>        | <b>n</b>        |
|------------------|--------------|-------------------------------------------------------------------------------------------------------------------------------|-----------------|-----------------|
|                  |              |                                                                                                                               | <i>(summer)</i> | <i>(autumn)</i> |
| Pre-Feeding      | Low          | Absence or occasional vocalization (snort, neigh), no pawing behavior.                                                        | 8               | 10              |
|                  | High         | Repetitive vocalization and/or pawing behavior.                                                                               | 9               | 7               |
| Novel Object     | Low          | Total absence or occurrence of just one of the following behaviors: pawing at object, startle response, defecation, snorting. | 9               | 14              |
|                  | High         | Presence of at least two of the following behaviors: pawing, startle response, defecation, snorting.                          | 9               | 4               |

565

566

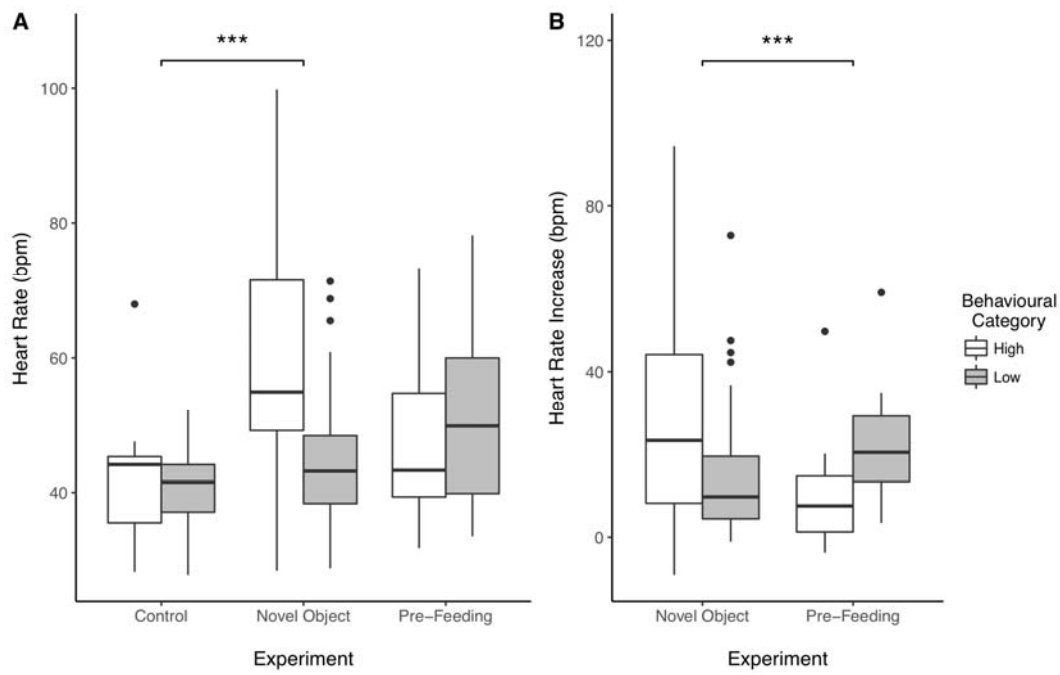

567

568 **Figure 1.** Effect of behavioral categorization on the mean heart rate (HR) (A) and HR  
569 increase (B) of the horses recorded during the study. Boxplots represent the median (black  
570 bar), the interquartile range – IQR (boxes), maximum and minimum values excluding outliers  
571 (whiskers) and outliers (black dots).

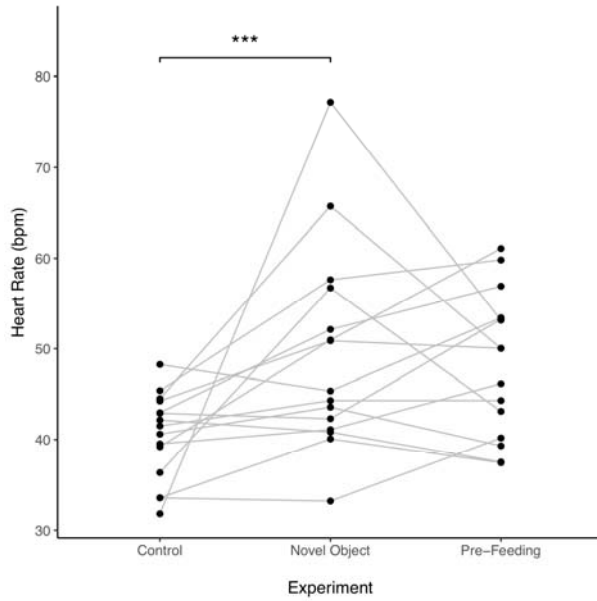

572

573 **Figure 2.** Individual average heart rate of horses across experiments. Points represent a value

574 per individual horse and the lines connect individual horses over different experiments.
